# Supplementary material
Source: Springer Nature journal article supplement (https://www.springermedizin.de/resource/supplementary/12889_2008_1782_MOESM1_ESM.pdf/9503992)
Supplement: MOESM1 [file 9503992]

### Gender

### Grade

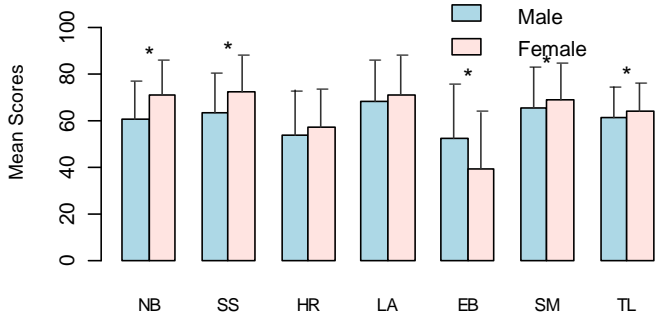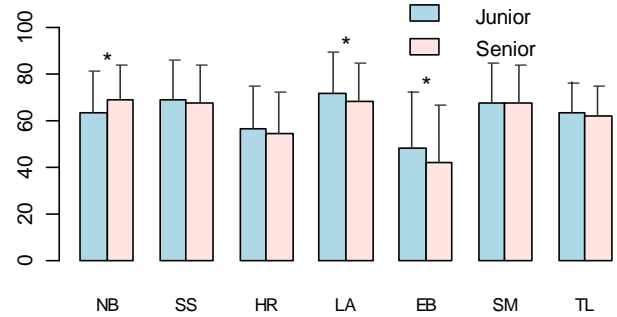

### Specialty

### Residence

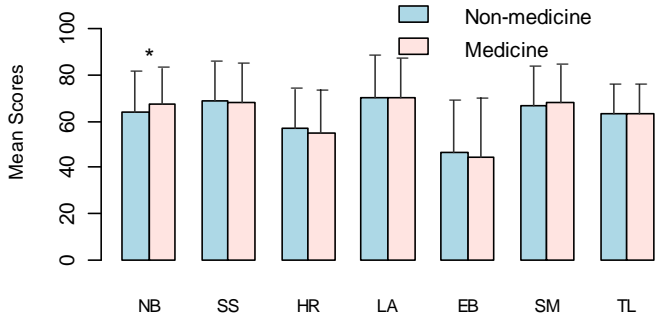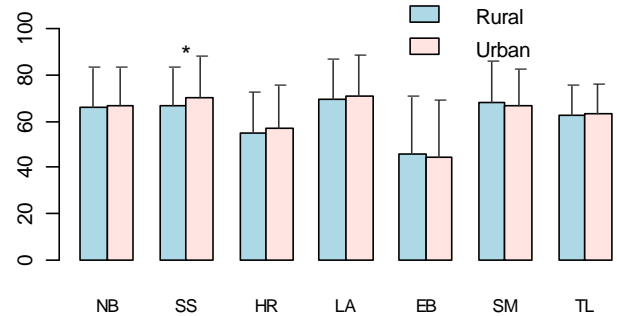

**Note:** \*  $P < 0.05$ . The bars represent standard deviation of score.

NB: Nutrition behavior, SS: Social support, HR: Health-responsibility, LA: Life-appreciation,

EB: Exercise behavior, SM: Stress-management, TL: Total
